# Supplementary material for: Effects of age-dependent changes in cell size on endothelial cell proliferation and senescence through YAP1
Source: publisher site journal article supplement (doi:10.18632/aging.102236), 2019-09-05
Supplement: Supplementary file [file aging-v11i17-102236-supplementary-material-SD1.pdf]

SUPPLEMENTARY FIGURES

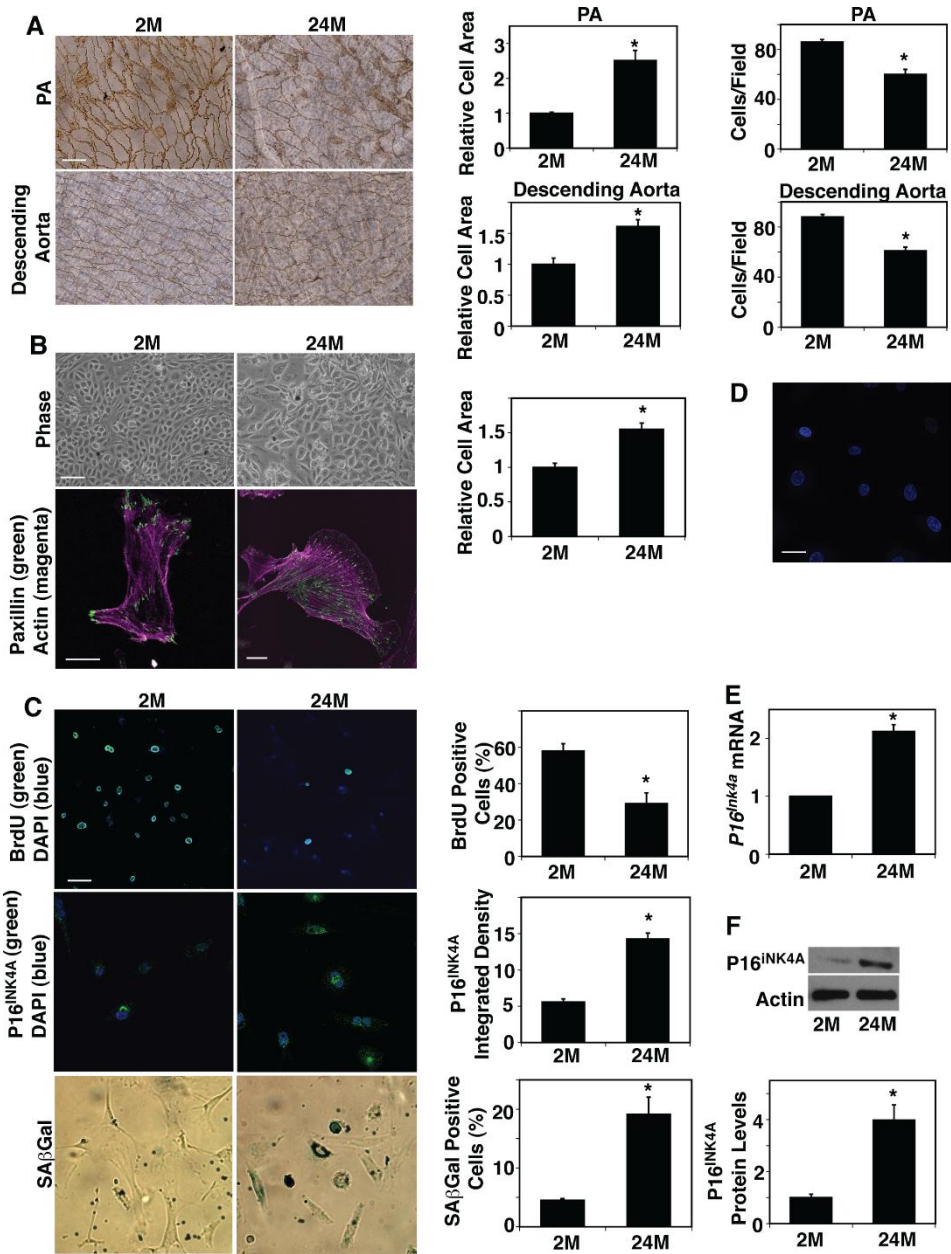

**Supplementary Figure 1. Age-dependent changes in mouse EC size, proliferation and senescence.** (A) Silver nitrate-stained 2M and 24M old mouse PA (*top*) and descending aorta (*bottom*). Scale bar, 20  $\mu$ m. Graphs showing quantification of cell area and density in PA (*top*) and descending aorta (*bottom*) dissecting from 2M and 24M old mice (n=7, mean  $\pm$  s.e.m., \*, p<0.05). (B) Phase contrast images of cultured ECs isolated from 2M vs. 24M old mouse lungs (*top*, scale bar, 100  $\mu$ m). IF micrographs showing paxillin-positive focal adhesions (green) and actin stress fiber formation (magenta, *bottom*). Scale bar, 20  $\mu$ m. Graph showing quantification of cell area of ECs isolated from 2M and 24M old mouse lungs (n=7, mean  $\pm$  s.e.m., \*, p<0.05). (C) IF micrographs showing BrdU<sup>+</sup> (*top*), P16<sup>INK4A</sup> (*middle*), and SA  $\beta$ Gal-stained (*bottom*) ECs isolated from 2M vs. 24M old mouse lungs. Graphs showing quantification of BrdU<sup>+</sup> (*top*), P16<sup>INK4A</sup> (*middle*), and SA $\beta$ Gal-stained (*bottom*) ECs isolated from 2M vs. 24M old mouse lungs (n=7, mean  $\pm$  s.e.m., \*, p<0.05). Scale bar, 20  $\mu$ m. (D) IF micrograph showing the 2<sup>nd</sup> Ab alone (green) and DAPI (blue) staining. Scale bar, 20  $\mu$ m. (E) Graph showing P16<sup>INK4A</sup> mRNA levels in ECs isolated from 2M vs. 24M old mouse lungs (n=5, mean  $\pm$  s.e.m., \*, p<0.05). (F) Representative immunoblots showing P16<sup>INK4A</sup> and  $\beta$ -actin protein levels in ECs isolated from 2M vs. 24M old mouse lungs (*top*). Graph showing the quantification of immunoblots (*bottom*, n=3, mean  $\pm$  s.e.m., \*, p<0.05).

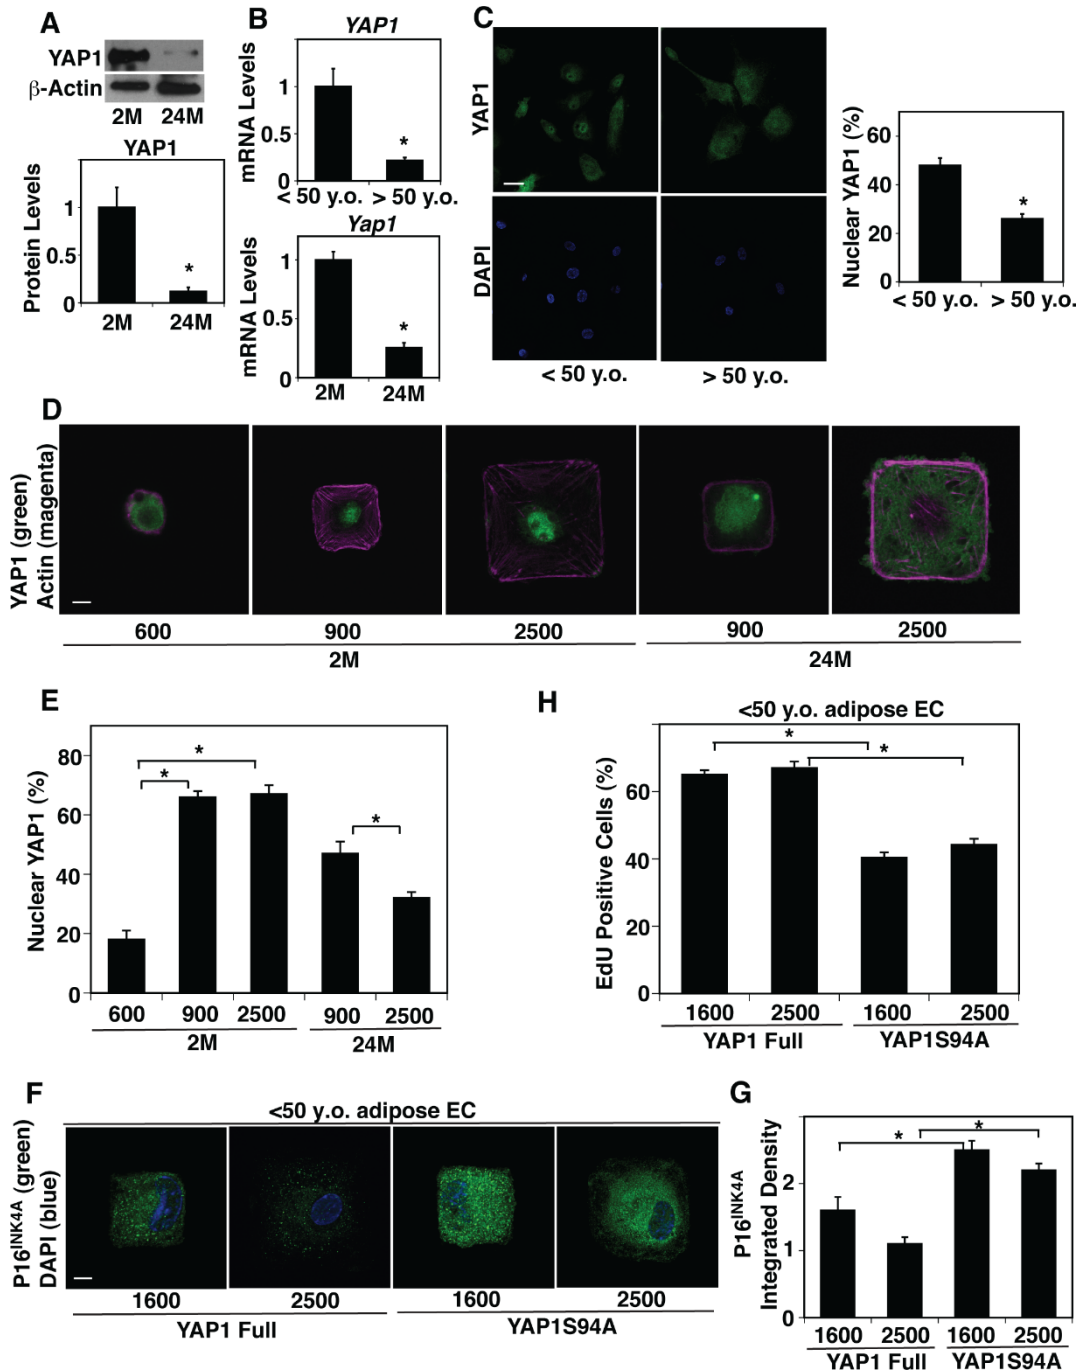

**Supplementary Figure 2. Cell size-dependent changes in YAP1 activity in mouse lung ECs.** (A) Representative immunoblots showing YAP1 and  $\beta$ -actin protein levels in ECs isolated from 2M vs. 24M old mouse lungs (*top*). Graph showing the quantification of immunoblots (*bottom*,  $n=3$ ,  $p<0.05$ ). (B) Graphs showing YAP1 mRNA levels in ECs isolated from <50 y.o. vs. >50 y.o. human adipose tissues (*top*) and 2M vs. 24M old mouse lungs (*bottom*,  $n=5$ , mean  $\pm$  s.e.m.,  $*$ ,  $p<0.05$ ). (C) IF micrographs showing YAP1 localization (*top*) and DAPI (*bottom*) in ECs isolated from <50 y.o. and >50 y.o. human adipose tissues. Scale bar, 20  $\mu$ m. Graph showing quantification of nuclear YAP1 in ECs isolated from <50 y.o. and >50 y.o. human adipose tissues ( $n=7$ , mean  $\pm$  s.e.m.,  $*$ ,  $p<0.05$ ). (D) IF micrographs showing YAP1 localization (green) and actin structure (magenta) in ECs isolated from 2M vs. 24M old mouse lungs and cultured on FN-coated island of different sizes. Scale bar, 10  $\mu$ m. (E) Graph showing quantification of nuclear YAP1 ( $n=7$ , mean  $\pm$  s.e.m.,  $*$ ,  $p<0.05$ ). (F) IF micrographs showing P16<sup>INK4A</sup> expression (green) and DAPI (blue) in ECs isolated from <50 y.o. human adipose tissues overexpressing full-length YAP1 or YAP1S94A, cultured on FN-coated island of different sizes. Scale bar, 10  $\mu$ m. (G) Graph showing quantification of P16<sup>INK4A</sup> integrated density in ECs isolated from <50 y.o. human adipose tissues overexpressing full-length YAP1 or YAP1S94A, cultured on FN-coated island of different sizes ( $n=7$ , mean  $\pm$  s.e.m.,  $*$ ,  $p<0.05$ ). (H) Graph showing quantification of EdU-positive ECs isolated from <50 y.o. human adipose tissues overexpressing full-length YAP1 or YAP1S94A, cultured on FN-coated island of different sizes ( $n=7$ , mean  $\pm$  s.e.m.,  $*$ ,  $p<0.05$ ).
